# Supplementary material for: Antibody to FcεRIα Suppresses Immunoglobulin E Binding to High-Affinity Receptor I in Allergic Inflammation
Source: PubMed Central journal article supplement — Yonsei Med J. 2016 Aug 30;57(6):1412–9. doi: 10.3349/ymj.2016.57.6.1412 (PMC5011273; doi:10.3349/ymj.2016.57.6.1412), 2016-08-30
Supplement: ymj-57-1412-s002.pdf [file ymj-57-1412-s002.pdf]

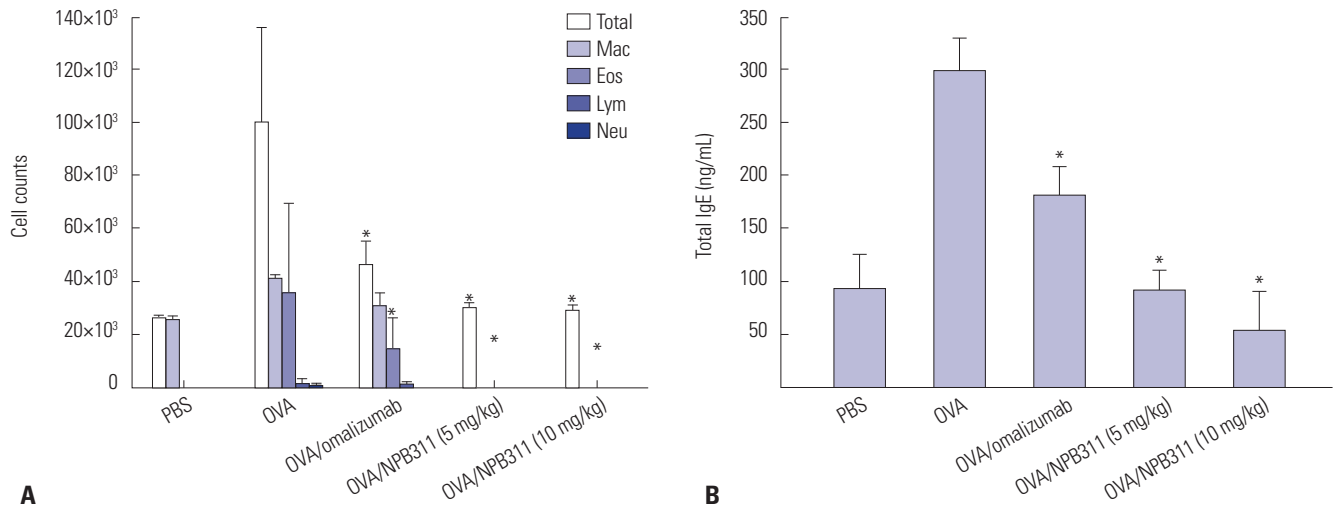

**Supplementary Fig. 1.** Effect of NPB311 on Th2 inflammation in an ovalbumin (OVA)-induced airway inflammation murine model. Mice were immunized intraperitoneally with OVA-alum (days 0 and 14) followed by OVA challenges. NPB311 was administered intraperitoneally on day 27 and 1 h before each airway challenge on days 28, 29, and 30. Bronchoalveolar lavage fluid was collected 24 h following the final OVA or saline challenges. (A) Total cells and differential cells were counted. (B) Total serum IgE levels were determined via ELISA (mean±SD, n=5–10 mice/group from four separate experiments). Compared with PBS, \**p*<0.05; compared with OVA. IgE, immunoglobulin E; ELISA, enzyme-linked immunosorbent assay; PBS, phosphate-buffered saline.
