# Supplementary material for: Antibody to FcεRIα Suppresses Immunoglobulin E Binding to High-Affinity Receptor I in Allergic Inflammation
Source: PubMed Central journal article supplement — Yonsei Med J. 2016 Aug 30;57(6):1412–9. doi: 10.3349/ymj.2016.57.6.1412 (PMC5011273; doi:10.3349/ymj.2016.57.6.1412), 2016-08-30
Supplement: ymj-57-1412-s003.pdf [file ymj-57-1412-s003.pdf]

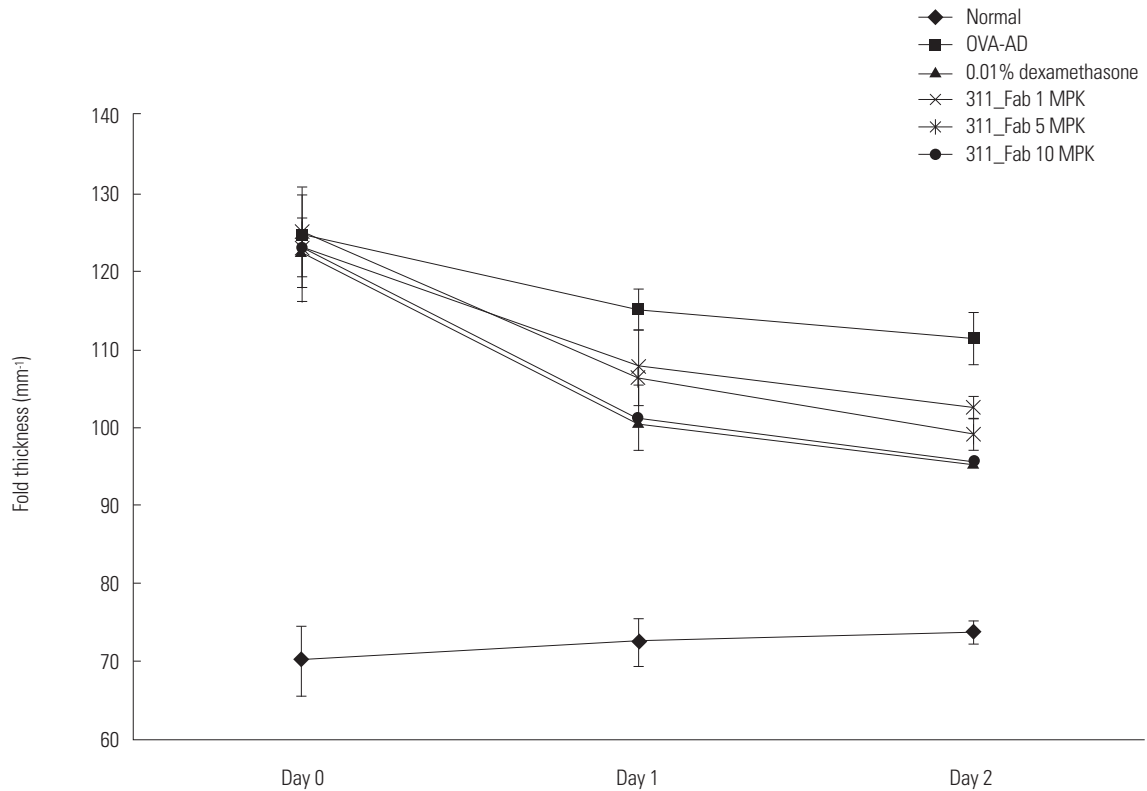

**Supplementary Fig. 2.** NPB311 significantly reduced the thickness of OVA-sensitized skin areas. Mice were sensitized with OVA (100  $\mu$ g) or saline applied in 100  $\mu$ L to a sterile patch. The patch was placed for a 1-week period and then removed. Two weeks later, an identical patch was reapplied to the same skin site. Each mouse had a total of three 1-week exposures to patches separated from each other by 2 week intervals. Mice were given the indicated concentration of NPB311 (1, 5, and 10 mg/kg, intraperitoneal injection) or dexamethasone (0.01%, epicutaneous administration) on days 47–49. Skin thickness was measured in micrometers (mean $\pm$ SD, n=5–10 mice/group from four separate experiments). OVA, ovalbumin; PBS, phosphate-buffered saline.
